# Supplementary material
Source: publisher site journal article supplement (https://www.dovepress.com/article/371887)
Supplement: Supplementary file 1 [file get_supplementary_file.php]

## Supplementary Materials

**Suppl Table 1. Migraine symptoms considered as most troublesome (physician-reported data)**

|                                         | <b>Overall<br/>N = 1112</b> |
|-----------------------------------------|-----------------------------|
| <b>Most troublesome symptoms, n (%)</b> |                             |
| Unilateral pain                         | 592 (53.2)                  |
| Bilateral pain                          | 118 (10.6)                  |
| Pulsating/throbbing pain                | 114 (10.3)                  |
| Photophobia                             | 11 (1.0)                    |
| Phonophobia                             | 13 (1.2)                    |
| Sensitivity to smell                    | 4 (0.4)                     |
| Pain worsened by activity               | 94 (8.5)                    |
| Sensory aura                            | 15 (1.4)                    |
| Nausea                                  | 49 (4.4)                    |
| Vomiting                                | 6 (0.5)                     |
| Visual aura/sight disturbance           | 10 (0.9)                    |
| Muscle weakness/fatigue                 | 15 (1.4)                    |
| Light-headedness                        | 79 (7.1)                    |

Abbreviations: N, total number of patients; n, number of patients in each category.

**Suppl Table 2. Healthcare resource utilization (physician-reported data)**

| <b>Healthcare resource</b>                                                     | <b>Overall<br/>N = 1113</b> |
|--------------------------------------------------------------------------------|-----------------------------|
| Current consultation due to migraine, n (%)                                    | 1111 (99.9)                 |
| Patients hospitalized due to migraine in the previous 12 months, n (%)         | 11 (1.0)                    |
| Number of hospital visits due to migraine in the previous 12 months, mean (SD) |                             |
| Number of patient consultations conducted in previous 12 months                | 3.7 (3.1)                   |
| Number of different tests used within 12 months                                | 3.5 (1.5)                   |

Continuous variables are reported as mean (SD) for non-missing observations; percentages are calculated as proportion of non-missing data.

Abbreviations: N, total number of patients; n, number of patients in each category; SD, standard deviation.
